# Supplementary material for: Synthesis, antioxidant, antibacterial, and DFT study on a coumarin based salen-type Schiff base and its copper complex
Source: publisher site journal article supplement (doi:10.1515/chempap-2016-0083), 2016-01-01
Supplement: Supplementary file 1 [file chempap-2016-0083_supplement.docx]

**SUPPLEMENTARY DATA**

**Synthesis, antioxidant, antibacterial, and DFT study on a coumarin based salen-type Schiff base and its copper complex**

**Vibha Sharma[[1]](#footnote-1)*, Ekta Kundra Arora, Savio Cardoza**

*Chemistry Department, St. Stephen’s College, University of Delhi, Delhi 110007, India*

Received 14 September 2015; Revised 2 March 2016; Accepted 21 March 2016

Additional information pertaining to characterization of L and CuL: the NMR and Mass spectrum of L (Fig. S1, S2), IR spectra of L and CuL (Fig. S3, S5), IR data of L and CuL (Table S7, S8), UV-Vis spectra of L and CuL (Fig. S4, S6) and TG/DTA of CuL (Fig. S9), DPPH free radical scavenging activity of L and CuL (Table S10) has been provided. Paboon analysis of L and CuL have also been provided (Table S11 and S12).


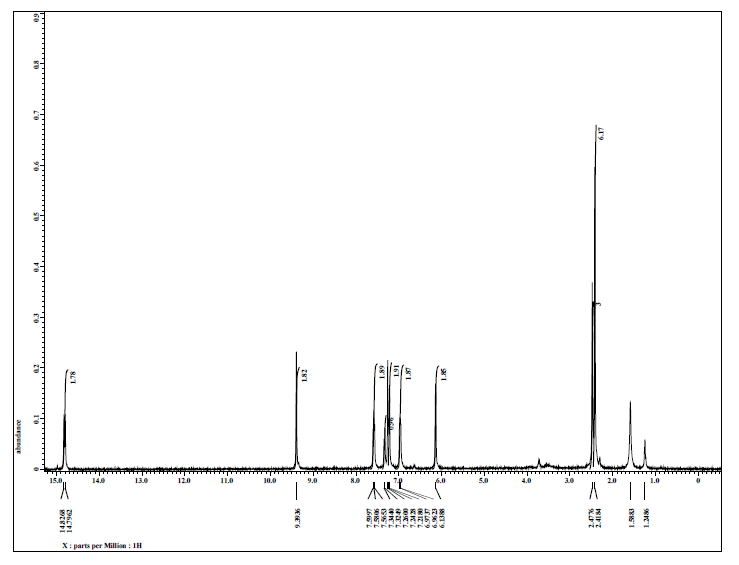


**Fig. S1.** NMR of L


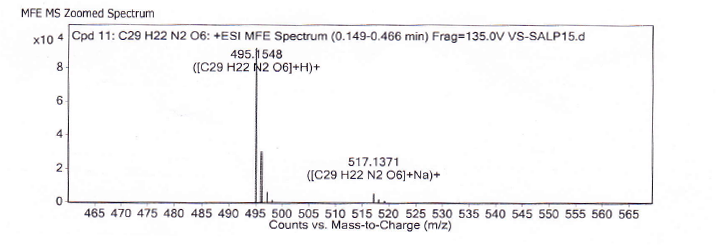


**Fig. S2.** Mass spectrum of L

**
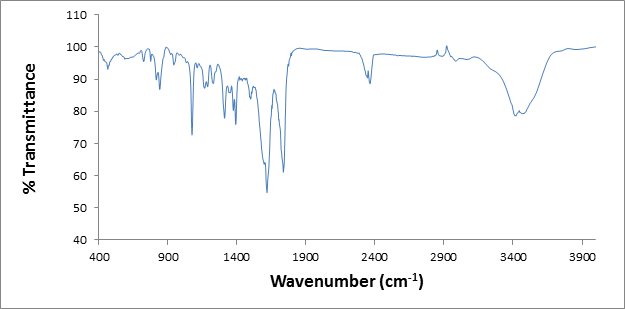
**

**Fig, S3.** I.R. spectra of L

**
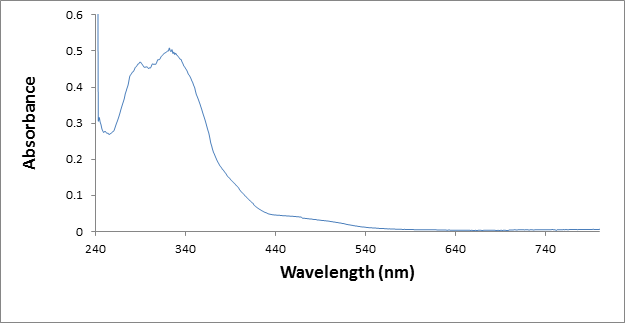
**

**Fig. S4.** UV-Vis spectra of L in ethanol


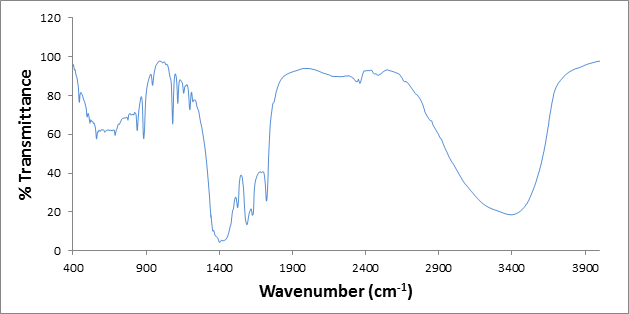


**Fig. S5.** I.R. spectra of CuL

**
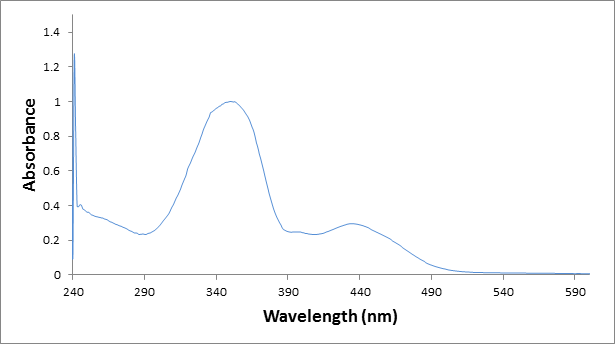
**

**Fig S6.** UV-Vis spectra of CuL in ethanol

**Table S7.** IR Data of L

| **Mode** | **Symmetry** | **Waveno. (cm-1)** | **IR Intensity** | **Selection Rules** | | **Mode** | **Symmetry** | **Waveno. (cm-1)** | **IR Intensity** | **Selection Rules** | |
| --- | --- | --- | --- | --- | --- | --- | --- | --- | --- | --- | --- |
| **(km/mol)** | **IR** | **Raman** | **(km/mol)** | **IR** | **Raman** |
| 1 |  | 0 | 0 | - | - | 90 | a | 942.46 | 15.7799 | YES | YES |
| 2 |  | 0 | 0 | - | - | 91 | a | 946.06 | 14.0235 | YES | YES |
| 3 |  | 0 | 0 | - | - | 92 | a | 963.2 | 26.4733 | YES | YES |
| 4 |  | 0 | 0 | - | - | 93 | a | 1005.16 | 2.08536 | YES | YES |
| 5 |  | 0 | 0 | - | - | 94 | a | 1013.95 | 6.24985 | YES | YES |
| 6 |  | 0 | 0 | - | - | 95 | a | 1021.5 | 3.63783 | YES | YES |
| 7 | a | 5.15 | 1.11679 | YES | YES | 96 | a | 1023.56 | 4.0447 | YES | YES |
| 8 | a | 8.49 | 0.57466 | YES | YES | 97 | a | 1031.31 | 2.34656 | YES | YES |
| 9 | a | 18.14 | 0.96961 | YES | YES | 98 | a | 1058.52 | 2.58914 | YES | YES |
| 10 | a | 31.91 | 3.87592 | YES | YES | 99 | a | 1059.9 | 2.49476 | YES | YES |
| 11 | a | 35.09 | 2.23821 | YES | YES | 100 | a | 1060.21 | 2.4276 | YES | YES |
| 12 | a | 40.55 | 2.49593 | YES | YES | 101 | a | 1070.75 | 388.593 | YES | YES |
| 13 | a | 44.91 | 0.37165 | YES | YES | 102 | a | 1071.68 | 111.955 | YES | YES |
| 14 | a | 51.24 | 0.28674 | YES | YES | 103 | a | 1134.74 | 91.3139 | YES | YES |
| 15 | a | 75.71 | 1.09725 | YES | YES | 104 | a | 1142.69 | 2.08449 | YES | YES |
| 16 | a | 98.42 | 1.16038 | YES | YES | 105 | a | 1145.7 | 28.96 | YES | YES |
| 17 | a | 100.91 | 0.35155 | YES | YES | 106 | a | 1159.73 | 19.9626 | YES | YES |
| 18 | a | 101.53 | 0.3897 | YES | YES | 107 | a | 1163.12 | 63.702 | YES | YES |
| 19 | a | 107.79 | 1.33595 | YES | YES | 108 | a | 1179.01 | 8.22308 | YES | YES |
| 20 | a | 109.41 | 1.21599 | YES | YES | 109 | a | 1195.03 | 14.0747 | YES | YES |
| 21 | a | 138.11 | 2.13766 | YES | YES | 110 | a | 1196.69 | 2.43819 | YES | YES |
| 22 | a | 157.06 | 0.13922 | YES | YES | 111 | a | 1229.97 | 14.3168 | YES | YES |
| 23 | a | 167.82 | 0.22435 | YES | YES | 112 | a | 1237.54 | 6.92287 | YES | YES |
| 24 | a | 181.48 | 2.33937 | YES | YES | 113 | a | 1238.84 | 9.6148 | YES | YES |
| 25 | a | 186.19 | 1.07607 | YES | YES | 114 | a | 1249.47 | 10.147 | YES | YES |
| 26 | a | 188.69 | 1.70316 | YES | YES | 115 | a | 1264.06 | 22.3997 | YES | YES |
| 27 | a | 196.2 | 7.23703 | YES | YES | 116 | a | 1268.74 | 13.536 | YES | YES |
| 28 | a | 202.73 | 5.87598 | YES | YES | 117 | a | 1296.04 | 15.6453 | YES | YES |
| 29 | a | 214.81 | 2.05923 | YES | YES | 118 | a | 1297.37 | 49.6215 | YES | YES |
| 30 | a | 223.59 | 0.44167 | YES | YES | 119 | a | 1303.02 | 15.6773 | YES | YES |
| 31 | a | 249.04 | 0.43277 | YES | YES | 120 | a | 1316.46 | 5.45527 | YES | YES |
| 32 | a | 275.98 | 3.33838 | YES | YES | 121 | a | 1335.3 | 192.793 | YES | YES |
| 33 | a | 279.21 | 7.28659 | YES | YES | 122 | a | 1336.05 | 42.9373 | YES | YES |
| 34 | a | 280.34 | 2.29101 | YES | YES | 123 | a | 1364.25 | 3.25641 | YES | YES |
| 35 | a | 283.57 | 1.3108 | YES | YES | 124 | a | 1364.69 | 2.50514 | YES | YES |
| 36 | a | 306.63 | 7.65642 | YES | YES | 125 | a | 1403.79 | 91.0945 | YES | YES |
| 37 | a | 318.05 | 5.64435 | YES | YES | 126 | a | 1404.58 | 58.3397 | YES | YES |
| 38 | a | 331.39 | 4.21899 | YES | YES | 127 | a | 1411.9 | 36.763 | YES | YES |
| 39 | a | 348.87 | 9.08744 | YES | YES | 128 | a | 1412.21 | 35.96 | YES | YES |
| 40 | a | 360.98 | 4.4709 | YES | YES | 129 | a | 1412.9 | 180.429 | YES | YES |
| 41 | a | 391.15 | 5.01216 | YES | YES | 130 | a | 1419.84 | 18.3808 | YES | YES |
| 42 | a | 407.35 | 4.9905 | YES | YES | 131 | a | 1421.85 | 19.2945 | YES | YES |
| 43 | a | 414.72 | 65.0675 | YES | YES | 132 | a | 1427.62 | 9.84312 | YES | YES |
| 44 | a | 421.46 | 43.062 | YES | YES | 133 | a | 1450.65 | 10.5262 | YES | YES |
| 45 | a | 425.35 | 12.7979 | YES | YES | 134 | a | 1455.37 | 16.7191 | YES | YES |
| 46 | a | 425.67 | 26.9959 | YES | YES | 135 | a | 1482.58 | 9.88036 | YES | YES |
| 47 | a | 427.51 | 8.81294 | YES | YES | 136 | a | 1484.37 | 9.75773 | YES | YES |
| 48 | a | 432.63 | 2.85445 | YES | YES | 137 | a | 1486.68 | 6.76591 | YES | YES |
| 49 | a | 471.31 | 34.3065 | YES | YES | 138 | a | 1490.54 | 10.345 | YES | YES |
| 50 | a | 482.63 | 4.35029 | YES | YES | 139 | a | 1492.68 | 11.8125 | YES | YES |
| 51 | a | 485.52 | 4.09368 | YES | YES | 140 | a | 1497.22 | 19.1846 | YES | YES |
| 52 | a | 501.91 | 2.70047 | YES | YES | 141 | a | 1513.53 | 51.0682 | YES | YES |
| 53 | a | 513.34 | 1.00347 | YES | YES | 142 | a | 1528.94 | 26.7847 | YES | YES |
| 54 | a | 527.97 | 2.04358 | YES | YES | 143 | a | 1529.88 | 14.9786 | YES | YES |
| 55 | a | 540.58 | 0.6357 | YES | YES | 144 | a | 1590.93 | 196.008 | YES | YES |
| 56 | a | 544.23 | 1.73681 | YES | YES | 145 | a | 1594.84 | 217.286 | YES | YES |
| 57 | a | 565.93 | 19.642 | YES | YES | 146 | a | 1600.73 | 39.7623 | YES | YES |
| 58 | a | 574.93 | 3.68737 | YES | YES | 147 | a | 1625.74 | 13.5926 | YES | YES |
| 59 | a | 580.34 | 4.02023 | YES | YES | 148 | a | 1635.8 | 242.758 | YES | YES |
| 60 | a | 595.3 | 14.4242 | YES | YES | 149 | a | 1636.14 | 127.462 | YES | YES |
| 61 | a | 601.49 | 8.67217 | YES | YES | 150 | a | 1664.52 | 49.3216 | YES | YES |
| 62 | a | 616.73 | 7.69108 | YES | YES | 151 | a | 1665.12 | 54.4846 | YES | YES |
| 63 | a | 618.85 | 2.7377 | YES | YES | 152 | a | 1681.54 | 56.4342 | YES | YES |
| 64 | a | 654.92 | 1.88009 | YES | YES | 153 | a | 1686.3 | 181.866 | YES | YES |
| 65 | a | 656.15 | 10.9014 | YES | YES | 154 | a | 1825.11 | 610.599 | YES | YES |
| 66 | a | 700.07 | 6.69999 | YES | YES | 155 | a | 1826.05 | 554.545 | YES | YES |
| 67 | a | 707.1 | 2.96428 | YES | YES | 156 | a | 3017.32 | 50.5185 | YES | YES |
| 68 | a | 720.66 | 1.38366 | YES | YES | 157 | a | 3025.61 | 11.2224 | YES | YES |
| 69 | a | 721.71 | 7.70392 | YES | YES | 158 | a | 3025.87 | 11.5506 | YES | YES |
| 70 | a | 725.85 | 1.12786 | YES | YES | 159 | a | 3063.81 | 9.02672 | YES | YES |
| 71 | a | 731.49 | 1.23571 | YES | YES | 160 | a | 3064.15 | 17.3898 | YES | YES |
| 72 | a | 749.29 | 2.45144 | YES | YES | 161 | a | 3064.49 | 21.2708 | YES | YES |
| 73 | a | 767.49 | 22.5233 | YES | YES | 162 | a | 3074.89 | 11.4729 | YES | YES |
| 74 | a | 770.58 | 7.59598 | YES | YES | 163 | a | 3075.27 | 11.5741 | YES | YES |
| 75 | a | 788.81 | 4.11525 | YES | YES | 164 | a | 3097.31 | 21.0356 | YES | YES |
| 76 | a | 796.31 | 31.7021 | YES | YES | 165 | a | 3119.35 | 20.7776 | YES | YES |
| 77 | a | 796.94 | 13.0285 | YES | YES | 166 | a | 3119.87 | 19.299 | YES | YES |
| 78 | a | 800.71 | 7.60328 | YES | YES | 167 | a | 3149.85 | 12.0912 | YES | YES |
| 79 | a | 804.06 | 7.94869 | YES | YES | 168 | a | 3150.69 | 11.3772 | YES | YES |
| 80 | a | 821.88 | 58.7659 | YES | YES | 169 | a | 3155.72 | 16.0955 | YES | YES |
| 81 | a | 834.05 | 1.93454 | YES | YES | 170 | a | 3158.03 | 13.4665 | YES | YES |
| 82 | a | 842.9 | 78.425 | YES | YES | 171 | a | 3176.45 | 13.3861 | YES | YES |
| 83 | a | 869.22 | 26.3945 | YES | YES | 172 | a | 3194.85 | 4.98552 | YES | YES |
| 84 | a | 874.46 | 28.5206 | YES | YES | 173 | a | 3195.41 | 5.04647 | YES | YES |
| 85 | a | 875.5 | 28.5693 | YES | YES | 174 | a | 3199.09 | 1.92868 | YES | YES |
| 86 | a | 890.58 | 2.47823 | YES | YES | 175 | a | 3199.39 | 1.98213 | YES | YES |
| 87 | a | 930.93 | 2.17066 | YES | YES | 176 | a | 3806.04 | 69.0153 | YES | YES |
| 88 | a | 933.42 | 2.07194 | YES | YES | 177 | a | 3807.02 | 71.6487 | YES | YES |
| 89 | a | 937.84 | 31.443 | YES | YES |  |  |  |  |  |  |

**Table S8.** IR Data of CuL

| **Mode** | **Symmetry** | **Waveno. (cm-1)** | **IR Intensity** | **Selection Rules** | | **Mode** | **Symmetry** | **Waveno. (cm-1)** | **IR Intensity** | **Selection Rules** | |
| --- | --- | --- | --- | --- | --- | --- | --- | --- | --- | --- | --- |
| **(km/mol)** | **IR** | **Raman** | **(km/mol)** | **IR** | **Raman** |
| 1 |  | 0 | 0 | - | - | 90 | a | 957.88 | 0.20085 | YES | YES |
| 2 |  | 0 | 0 | - | - | 91 | a | 972.5 | 7.25033 | YES | YES |
| 3 |  | 0 | 0 | - | - | 92 | a | 977.98 | 0.1304 | YES | YES |
| 4 |  | 0 | 0 | - | - | 93 | a | 978.28 | 0.20236 | YES | YES |
| 5 |  | 0 | 0 | - | - | 94 | a | 995.84 | 5.39054 | YES | YES |
| 6 |  | 0 | 0 | - | - | 95 | a | 997.65 | 0.18027 | YES | YES |
| 7 | a | 6.8 | 0.38189 | YES | YES | 96 | a | 1021.84 | 9.54941 | YES | YES |
| 8 | a | 20.53 | 0.03934 | YES | YES | 97 | a | 1024.49 | 11.3717 | YES | YES |
| 9 | a | 29.06 | 4.41761 | YES | YES | 98 | a | 1036.05 | 19.3655 | YES | YES |
| 10 | a | 36.76 | 0.29312 | YES | YES | 99 | a | 1055.36 | 2.69952 | YES | YES |
| 11 | a | 40.46 | 0.72763 | YES | YES | 100 | a | 1058.72 | 2.63397 | YES | YES |
| 12 | a | 55.53 | 0.01336 | YES | YES | 101 | a | 1060.65 | 4.00378 | YES | YES |
| 13 | a | 61.79 | 0.3201 | YES | YES | 102 | a | 1085.04 | 252.557 | YES | YES |
| 14 | a | 80.51 | 1.42414 | YES | YES | 103 | a | 1088.34 | 14.5475 | YES | YES |
| 15 | a | 90.24 | 1.14505 | YES | YES | 104 | a | 1129.81 | 72.5136 | YES | YES |
| 16 | a | 91.89 | 1.929 | YES | YES | 105 | a | 1145.58 | 32.8866 | YES | YES |
| 17 | a | 99.74 | 0.15006 | YES | YES | 106 | a | 1145.98 | 17.2941 | YES | YES |
| 18 | a | 115.79 | 0.03258 | YES | YES | 107 | a | 1155.84 | 15.1906 | YES | YES |
| 19 | a | 124.6 | 0.00701 | YES | YES | 108 | a | 1160.98 | 40.4109 | YES | YES |
| 20 | a | 130.35 | 0.00174 | YES | YES | 109 | a | 1193.84 | 1.23242 | YES | YES |
| 21 | a | 161.1 | 0.06125 | YES | YES | 110 | a | 1214.01 | 37.0434 | YES | YES |
| 22 | a | 162.28 | 0.0905 | YES | YES | 111 | a | 1218.96 | 93.4092 | YES | YES |
| 23 | a | 163.01 | 0.56467 | YES | YES | 112 | a | 1239.01 | 20.2579 | YES | YES |
| 24 | a | 172.49 | 2.38932 | YES | YES | 113 | a | 1244.3 | 31.7926 | YES | YES |
| 25 | a | 187.15 | 0.17941 | YES | YES | 114 | a | 1252.79 | 10.5057 | YES | YES |
| 26 | a | 200.09 | 0.03562 | YES | YES | 115 | a | 1264.08 | 4.70579 | YES | YES |
| 27 | a | 203.58 | 1.09153 | YES | YES | 116 | a | 1268.05 | 3.60751 | YES | YES |
| 28 | a | 218.26 | 3.62327 | YES | YES | 117 | a | 1269.11 | 5.10255 | YES | YES |
| 29 | a | 227.23 | 1.47834 | YES | YES | 118 | a | 1312.58 | 25.619 | YES | YES |
| 30 | a | 243.46 | 7.57489 | YES | YES | 119 | a | 1327.86 | 13.9722 | YES | YES |
| 31 | a | 260.21 | 3.31608 | YES | YES | 120 | a | 1366.24 | 0.1679 | YES | YES |
| 32 | a | 261.64 | 0.178 | YES | YES | 121 | a | 1368.51 | 9.8138 | YES | YES |
| 33 | a | 270.5 | 0.94629 | YES | YES | 122 | a | 1375.35 | 488.519 | YES | YES |
| 34 | a | 283.59 | 1.53416 | YES | YES | 123 | a | 1387.83 | 59.3505 | YES | YES |
| 35 | a | 284.96 | 9.39799 | YES | YES | 124 | a | 1403.55 | 10.6767 | YES | YES |
| 36 | a | 302.83 | 4.51045 | YES | YES | 125 | a | 1404.83 | 8.67246 | YES | YES |
| 37 | a | 325.6 | 0.21731 | YES | YES | 126 | a | 1407.88 | 48.7934 | YES | YES |
| 38 | a | 327.29 | 0.94872 | YES | YES | 127 | a | 1412.96 | 39.9557 | YES | YES |
| 39 | a | 338.63 | 4.28801 | YES | YES | 128 | a | 1419.29 | 0.33725 | YES | YES |
| 40 | a | 345.05 | 4.65949 | YES | YES | 129 | a | 1431.15 | 532.466 | YES | YES |
| 41 | a | 350.31 | 0.44646 | YES | YES | 130 | a | 1436.2 | 15.4816 | YES | YES |
| 42 | a | 360.2 | 1.19243 | YES | YES | 131 | a | 1446.7 | 268.756 | YES | YES |
| 43 | a | 391.71 | 13.9552 | YES | YES | 132 | a | 1454.01 | 5.32236 | YES | YES |
| 44 | a | 406.47 | 8.56189 | YES | YES | 133 | a | 1460.12 | 23.3768 | YES | YES |
| 45 | a | 436.67 | 6.55519 | YES | YES | 134 | a | 1481.07 | 10.7152 | YES | YES |
| 46 | a | 439.91 | 39.9479 | YES | YES | 135 | a | 1482.86 | 178.859 | YES | YES |
| 47 | a | 446.53 | 50.5798 | YES | YES | 136 | a | 1483.9 | 60.7625 | YES | YES |
| 48 | a | 455.36 | 3.88037 | YES | YES | 137 | a | 1486.63 | 7.33887 | YES | YES |
| 49 | a | 475.87 | 1.8866 | YES | YES | 138 | a | 1487.96 | 55.4172 | YES | YES |
| 50 | a | 491.18 | 0.25898 | YES | YES | 139 | a | 1492.34 | 6.20822 | YES | YES |
| 51 | a | 500.99 | 70.591 | YES | YES | 140 | a | 1501.23 | 188.709 | YES | YES |
| 52 | a | 515.27 | 0.15712 | YES | YES | 141 | a | 1502.24 | 295.675 | YES | YES |
| 53 | a | 520.14 | 59.9 | YES | YES | 142 | a | 1526.61 | 46.7101 | YES | YES |
| 54 | a | 528.72 | 3.09606 | YES | YES | 143 | a | 1550.53 | 604.169 | YES | YES |
| 55 | a | 542.74 | 4.79574 | YES | YES | 144 | a | 1558.19 | 10.1519 | YES | YES |
| 56 | a | 560.75 | 86.271 | YES | YES | 145 | a | 1601.74 | 46.8706 | YES | YES |
| 57 | a | 569.18 | 0.5277 | YES | YES | 146 | a | 1613.88 | 406.036 | YES | YES |
| 58 | a | 574.4 | 5.01158 | YES | YES | 147 | a | 1616.71 | 236.986 | YES | YES |
| 59 | a | 577.84 | 0.52569 | YES | YES | 148 | a | 1623.7 | 1127.69 | YES | YES |
| 60 | a | 589.61 | 26.0896 | YES | YES | 149 | a | 1640.01 | 41.0289 | YES | YES |
| 61 | a | 596.44 | 4.47219 | YES | YES | 150 | a | 1649.83 | 245.38 | YES | YES |
| 62 | a | 605.91 | 7.11188 | YES | YES | 151 | a | 1662.17 | 466.395 | YES | YES |
| 63 | a | 630.67 | 2.24608 | YES | YES | 152 | a | 1665.67 | 141.041 | YES | YES |
| 64 | a | 647.18 | 0.72648 | YES | YES | 153 | a | 1824.75 | 340.502 | YES | YES |
| 65 | a | 671.95 | 1.81743 | YES | YES | 154 | a | 1825.72 | 930.534 | YES | YES |
| 66 | a | 672.88 | 2.49547 | YES | YES | 155 | a | 3024.05 | 32.4548 | YES | YES |
| 67 | a | 709.5 | 1.02613 | YES | YES | 156 | a | 3025.79 | 10.5356 | YES | YES |
| 68 | a | 718.55 | 1.56086 | YES | YES | 157 | a | 3027.17 | 10.6271 | YES | YES |
| 69 | a | 723.31 | 0.0262 | YES | YES | 158 | a | 3073.05 | 15.2469 | YES | YES |
| 70 | a | 724.07 | 8.06313 | YES | YES | 159 | a | 3075.6 | 11.2476 | YES | YES |
| 71 | a | 729 | 8.67392 | YES | YES | 160 | a | 3077.11 | 11.1295 | YES | YES |
| 72 | a | 733.83 | 1.11024 | YES | YES | 161 | a | 3107.05 | 11.8611 | YES | YES |
| 73 | a | 751.95 | 0.19663 | YES | YES | 162 | a | 3118.5 | 25.8505 | YES | YES |
| 74 | a | 781.07 | 12.2774 | YES | YES | 163 | a | 3119.01 | 23.4078 | YES | YES |
| 75 | a | 783.44 | 0.67133 | YES | YES | 164 | a | 3151.1 | 5.59926 | YES | YES |
| 76 | a | 801.2 | 25.4348 | YES | YES | 165 | a | 3155.02 | 4.25405 | YES | YES |
| 77 | a | 817.31 | 3.41398 | YES | YES | 166 | a | 3166.13 | 8.98696 | YES | YES |
| 78 | a | 819.09 | 16.2206 | YES | YES | 167 | a | 3179.04 | 3.83312 | YES | YES |
| 79 | a | 822.75 | 30.3262 | YES | YES | 168 | a | 3179.27 | 3.84736 | YES | YES |
| 80 | a | 825.38 | 13.7835 | YES | YES | 169 | a | 3186.56 | 6.0454 | YES | YES |
| 81 | a | 837.31 | 45.2704 | YES | YES | 170 | a | 3195.59 | 5.11758 | YES | YES |
| 82 | a | 842.53 | 6.34095 | YES | YES | 171 | a | 3200.4 | 2.0622 | YES | YES |
| 83 | a | 843.09 | 33.6096 | YES | YES | 172 | a | 3200.4 | 0.92616 | YES | YES |
| 84 | a | 864.23 | 38.6013 | YES | YES | 173 | a | 3201.03 | 6.7179 | YES | YES |
| 85 | a | 865.05 | 48.0849 | YES | YES | 174 | a | 3201.36 | 8.37561 | YES | YES |
| 86 | a | 876.03 | 4.35615 | YES | YES |  |  |  |  |  |  |
| 87 | a | 892.37 | 1.09009 | YES | YES |  |  |  |  |  |  |
| 88 | a | 947.93 | 73.2948 | YES | YES |  |  |  |  |  |  |
| 89 | a | 948.22 | 13.1465 | YES | YES |  |  |  |  |  |  |

**
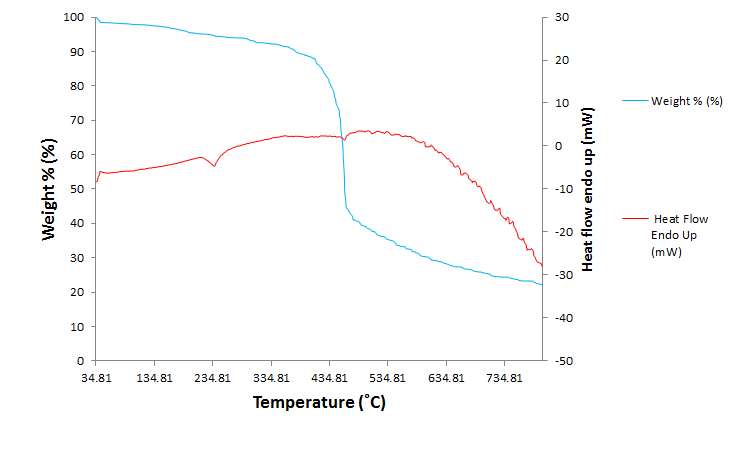
**

**Fig S9** TGDTA curve of CuL

**Table S10.** DPPH free radical scavenging activity of L and CuL

| **Compound** | **1000 (ppm)** | **500 (ppm)** | **250 (ppm)** | **125 (ppm)** | **62.5 (ppm)** |
| --- | --- | --- | --- | --- | --- |
| GA | 92.4 | 82.4 | 72.4 | 62.4 | 92.4 |
| Q | 82.3 | 70.3 | 65.3 | 55.3 | 82.3 |
| L | 62.1 | 51.3 | 44.6 | 32.7 | 29.3 |
| CuL | 59.6 | 55.2 | 43.8 | 37.8 | 32.8 |

**Table S11.** Paboon analysis of L

| **Atom** | **Charge** | **Atom** | **Charge** | **Atom** | **Charge** |
| --- | --- | --- | --- | --- | --- |
| 1C | -0.053 | 21C | 0.4282 | 41H | 0.0228 |
| 2C | 0.0905 | 22H | 0.0228 | 42O | -0.1362 |
| 3C | 0.0796 | 23H | 0.0286 | 43H | 0.1339 |
| 4C | -0.0525 | 24C | 0.0927 | 44O | -0.1363 |
| 5C | -0.0291 | 25H | 0.0439 | 45H | 0.1341 |
| 6C | -0.0173 | 26O | -0.3627 | 46C | -0.1427 |
| 7H | 0.0291 | 27C | -0.1558 | 47H | 0.0583 |
| 8N | -0.1545 | 28C | 0.4286 | 48H | 0.0516 |
| 9N | -0.1581 | 29C | 0.0256 | 49H | 0.0589 |
| 10H | 0.0307 | 30O | -0.1939 | 50C | -0.1419 |
| 11H | 0.0184 | 31C | -0.1175 | 51H | 0.0517 |
| 12C | -0.122 | 32C | 0.2734 | 52H | 0.0584 |
| 13C | 0.244 | 33C | 0.0017 | 53H | 0.0575 |
| 14C | 0.0016 | 34C | -0.1478 | 54C | -0.1472 |
| 15C | -0.1461 | 35C | -0.1214 | 55H | 0.0488 |
| 16C | -0.1173 | 36C | 0.2451 | 56H | 0.0422 |
| 17C | 0.2723 | 37H | 0.0441 | 57H | 0.048 |
| 18C | 0.026 | 38O | -0.3622 | 58H | 0.0244 |
| 19O | -0.1931 | 39H | 0.029 | 59H | 0.0235 |
| 20C | -0.1558 | 40C | 0.0947 |  |  |

**Table S12.** Paboon analysis of CuL

| **Atom** | **Charge** | **Atom** | **Charge** | **Atom** | **Charge** |
| --- | --- | --- | --- | --- | --- |
| 1H | 0.0384 | 21C | -0.1408 | 41C | 0.1571 |
| 2H | 0.038 | 22C | -0.1373 | 42O | -0.3714 |
| 3C | -0.0065 | 23O | -0.2043 | 43H | 0.028 |
| 4C | -0.0065 | 24C | 0.0918 | 44H | 0.0489 |
| 5C | -0.0065 | 25C | 0.2949 | 45C | -0.1417 |
| 6H | -0.0065 | 26C | -0.0053 | 46H | 0.0593 |
| 7H | -0.0065 | 27O | -0.3717 | 47Cu | 0.8297 |
| 8C | -0.0065 | 28C | -0.2371 | 48C | 0.0327 |
| 9H | -0.0065 | 29H | 0.059 | 49C | -0.0618 |
| 10C | -0.0065 | 30H | 0.0439 | 50H | 0.0536 |
| 11C | -0.0065 | 31C | -0.0744 | 51H | 0.051 |
| 12H | -0.0065 | 32C | 0.2783 | 52C | 0.1601 |
| 13C | 0.4293 | 33C | 0.1085 | 53H | 0.0441 |
| 14H | 0.0494 | 34C | -0.1418 | 54N | -0.2313 |
| 15N | -0.2276 | 35C | 0.0344 | 55H | 0.0594 |
| 16O | -0.4716 | 36C | 0.4291 | 56C | 0.294 |
| 17H | 0.0507 | 37H | 0.0293 | 57O | -0.2042 |
| 18C | -0.2384 | 38C | 0.009 | 58H | 0.0534 |
| 19C | -0.1386 | 39H | 0.0594 |  |  |
| 20O | -0.4709 | 40C | -0.0754 |  |  |

1. *Corresponding author, e-mail: vibhasharmastephens@hotmail.com [↑](#footnote-ref-1)
